# Supplementary material for: Molecular Characterization and Expression Profiles of Polygalacturonase Genes in Apolygus lucorum (Hemiptera: Miridae)
Source: PubMed Central journal article supplement (PMC4425681; doi:10.1371/journal.pone.0126391), 2015-05-08
Supplement: pone.0126391.s001.pdf [file pone.0126391.s001.pdf]

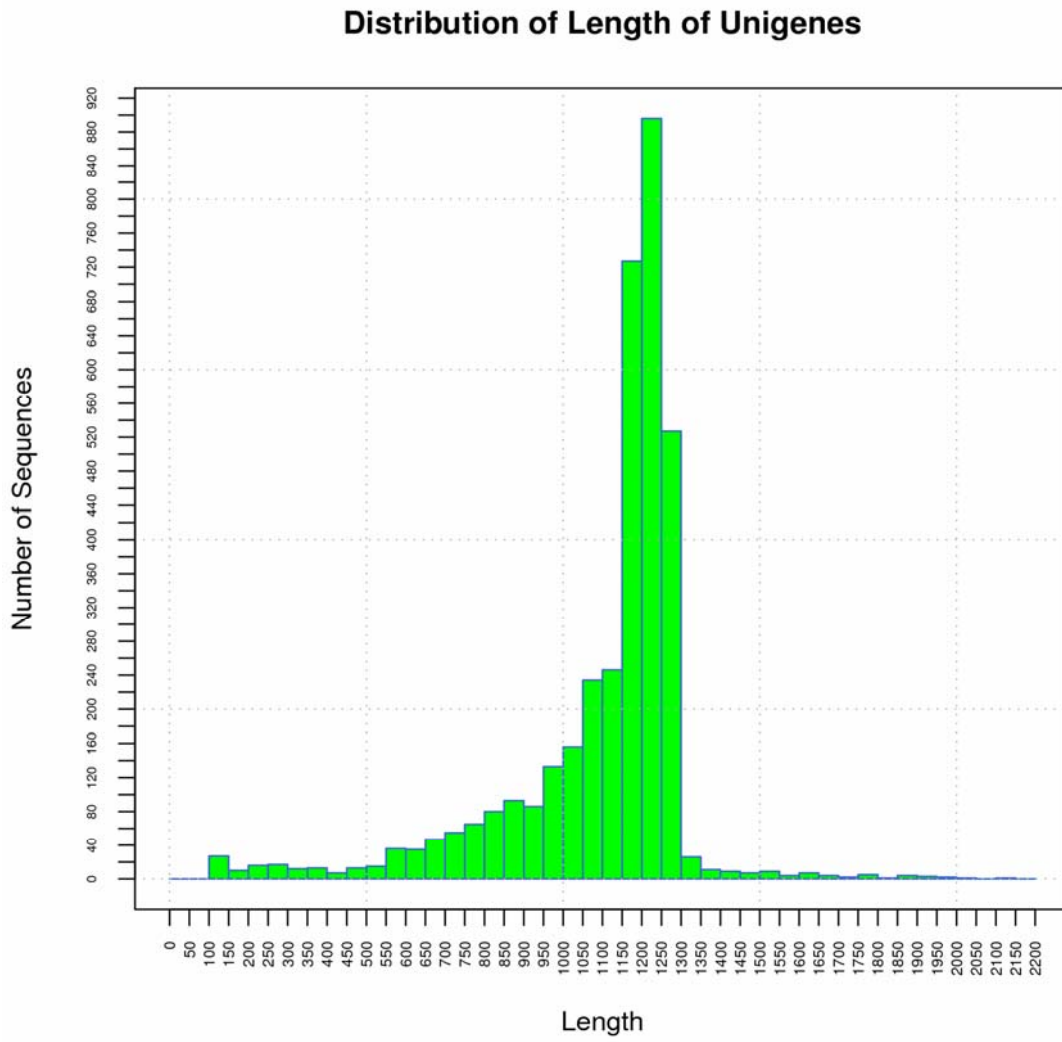

**S1 Fig.** Distribution of the sequence length of the unigenes in the salivary gland of *Apolygus lucorum* cDNA library
