# Supplementary material for: Molecular Characterization and Expression Profiles of Polygalacturonase Genes in Apolygus lucorum (Hemiptera: Miridae)
Source: PubMed Central journal article supplement (PMC4425681; doi:10.1371/journal.pone.0126391), 2015-05-08
Supplement: pone.0126391.s002.pdf [file pone.0126391.s002.pdf]

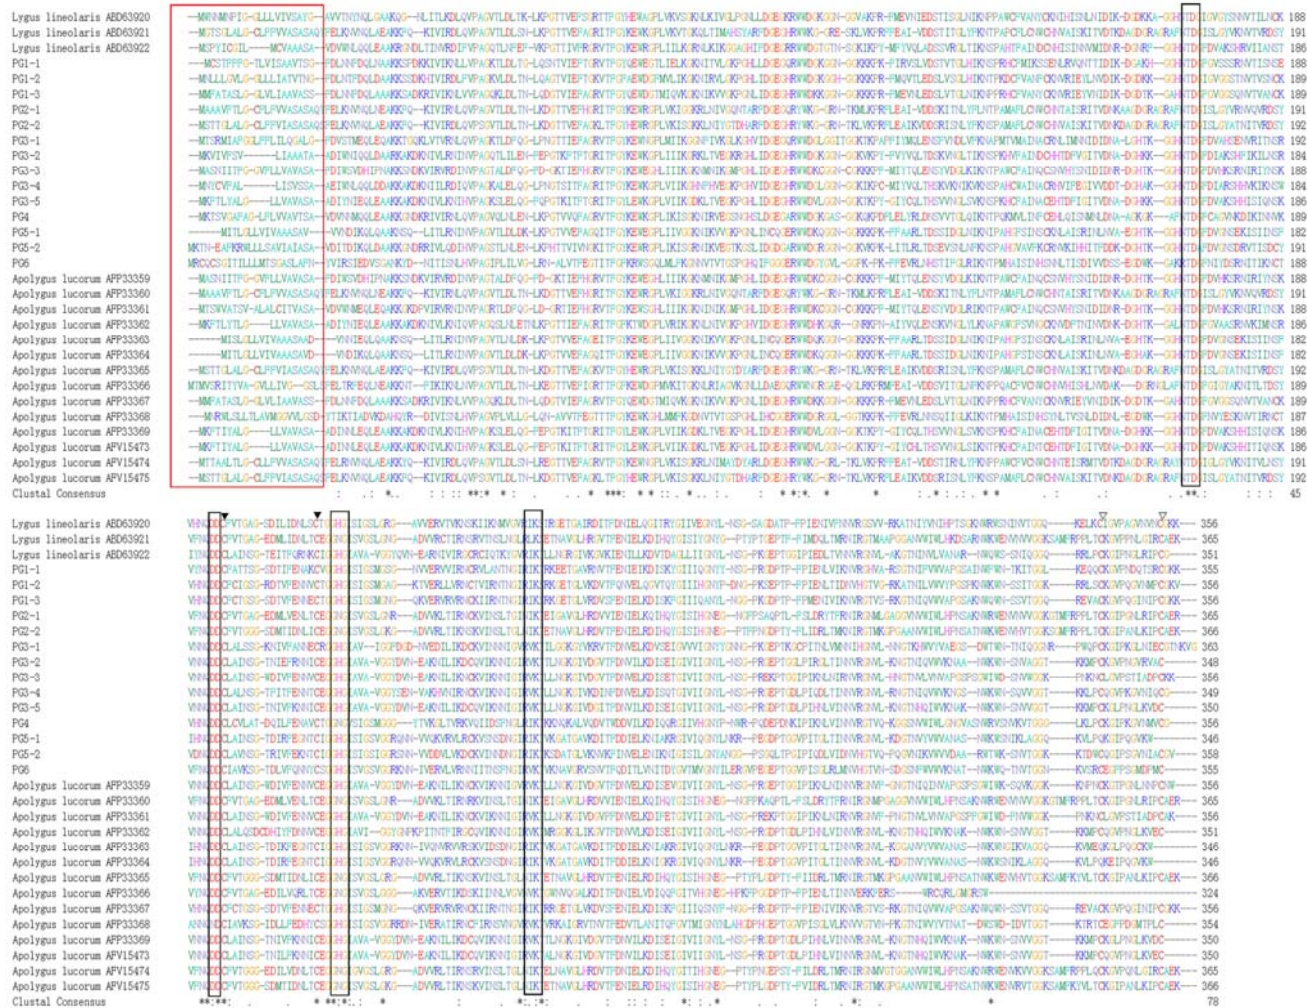

**S2 Fig.** Alignments of the amino acid sequences of PGs from mirid bugs. The red line box represents predicted N-terminal signal peptides. The black boxes stand for enzymatically critical amino acid motifs. ▼ and ▽ represent putative disulfide bridges. - = gaps. \* = identical residues, : = strong positive residues, . = weaker positive residues.
