# Supplementary material for: Molecular Characterization and Expression Profiles of Polygalacturonase Genes in Apolygus lucorum (Hemiptera: Miridae)
Source: PubMed Central journal article supplement (PMC4425681; doi:10.1371/journal.pone.0126391), 2015-05-08
Supplement: pone.0126391.s003.pdf [file pone.0126391.s003.pdf]

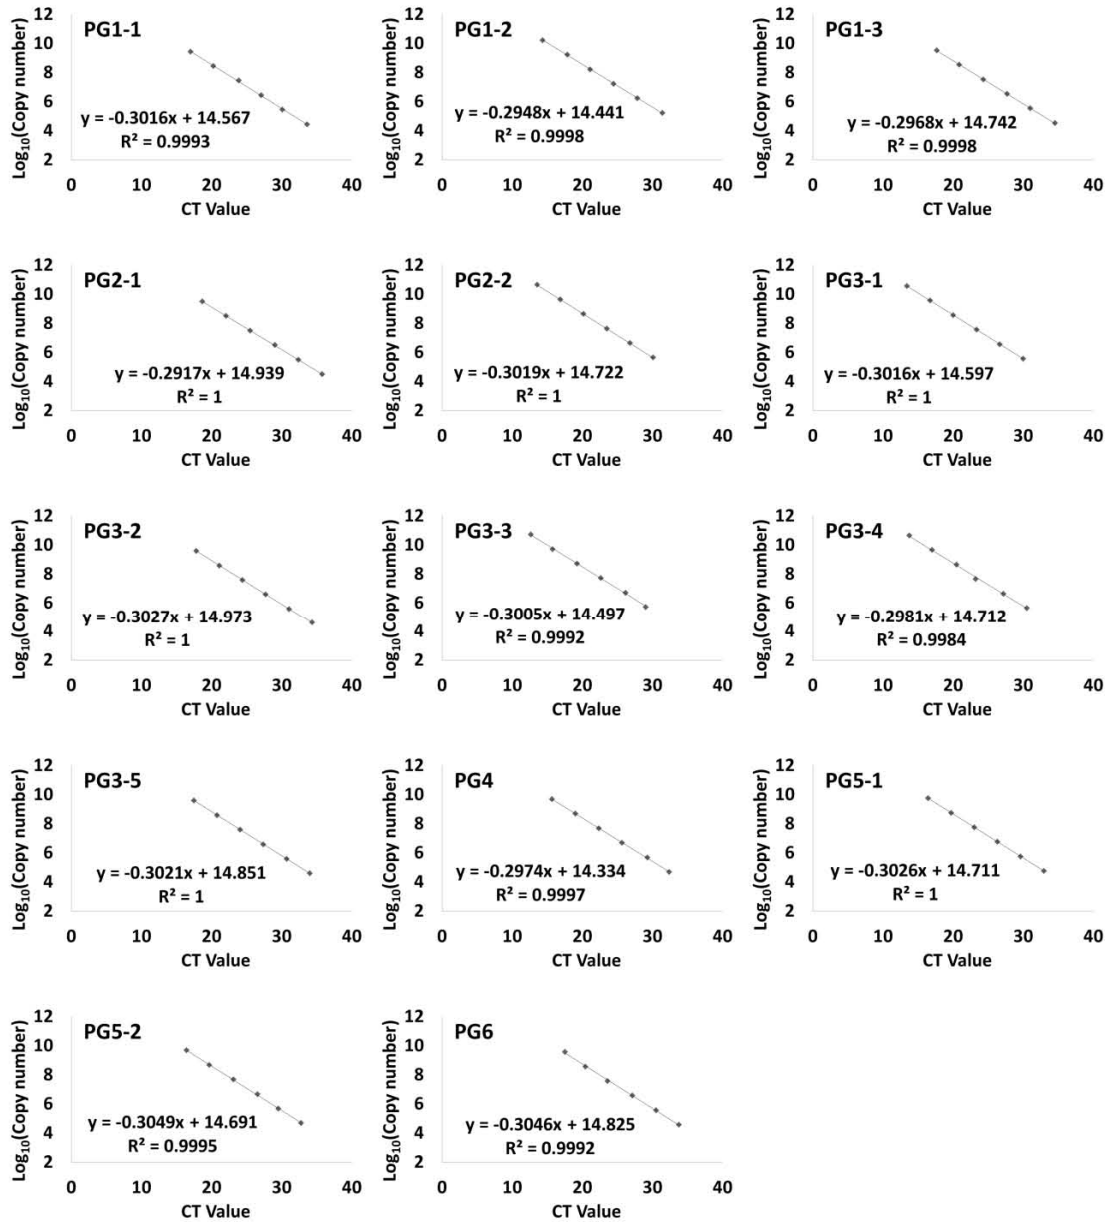

**S3 Fig.** Standard curves for PG genes of *Apolygus lucorum* determined by triplicate sampling.
