# Supplementary material for: Molecular Characterization and Expression Profiles of Polygalacturonase Genes in Apolygus lucorum (Hemiptera: Miridae)
Source: PubMed Central journal article supplement (PMC4425681; doi:10.1371/journal.pone.0126391), 2015-05-08
Supplement: pone.0126391.s004.pdf [file pone.0126391.s004.pdf]

**S1 Table. Primers used for PG genes**

| Primer name  | Sequence (5'-3')           | Type                                                             |                                                                                                                                 |
|--------------|----------------------------|------------------------------------------------------------------|---------------------------------------------------------------------------------------------------------------------------------|
| PG1-1F-3RACE | GAACACTAAAATCACTGGCGG      |                                                                  |                                                                                                                                 |
| PG1-2F-3RACE | GTGAACCCACTCCATTCCCCATCGAA |                                                                  |                                                                                                                                 |
| PG1-3F-3RACE | GAGAGACTGGTTTGGTTAGGGATGTA |                                                                  |                                                                                                                                 |
| PG2-1F-3RACE | GACGACTGCTTTGTCACTGGAGGTGG |                                                                  |                                                                                                                                 |
| PG2-2F-3RACE | AACATCAAGACGGAAACCAACGCA   |                                                                  |                                                                                                                                 |
| PG3-1F-3RACE | CAAGGACGTCAGCGAAATTGGTGT   |                                                                  |                                                                                                                                 |
| PG3-2F-3RACE | ACACTGAACGGCAAAGGTATCG     |                                                                  |                                                                                                                                 |
| PG3-3F-3RACE | AGGGAGGTCACGGTATCGCTGTCTG  |                                                                  |                                                                                                                                 |
| PG3-4F-3RACE | CGTGCTCAGAAACGGAACCAACAT   |                                                                  |                                                                                                                                 |
| PG3-5F-3RACE | TCGCTGTTGCTGTAGGAGGTTATG   |                                                                  |                                                                                                                                 |
| PG4 F-3RACE  | GAAGTGGAGAGTCAGCAACGTGAA   |                                                                  |                                                                                                                                 |
| PG5-1F-3RACE | CAAGCGTCCTGAAGGCGACCCAAC   |                                                                  |                                                                                                                                 |
| PG5-2F-3RACE | CAAAGTTTGGGTGGTCGATGCCGC   |                                                                  |                                                                                                                                 |
| PG6 F-3RACE  | TAGGTAACACTACATCCTGGAGCGAG |                                                                  |                                                                                                                                 |
| PG1-1R-5RACE | TTTCAAATGAAATCAGAGCCT      | 3'RACE and<br>5'RACE for PGs<br>from <i>Apolygus<br/>lucorum</i> |                                                                                                                                 |
| PG1-2R-5RACE | TACGAACAGGTCCCGAATAAC      |                                                                  |                                                                                                                                 |
| PG1-3R-5RACE | TTGTCCCAACGATGTCCT         |                                                                  |                                                                                                                                 |
| PG2-1R-5RACE | AACAGGAAACATCCAAGGGTG      |                                                                  |                                                                                                                                 |
| PG2-2R-5RACE | CACAAAGAACAAGCACCCAAG      |                                                                  |                                                                                                                                 |
| PG3-1R-5RACE | GTCCAGAGTCTTCCCAGCAGG      |                                                                  |                                                                                                                                 |
| PG3-2R-5RACE | TGCGACCTTTGATGATAATGAG     |                                                                  |                                                                                                                                 |
| PG3-3R-5RACE | CAGCGACGAGAAGGAAGACAC      |                                                                  |                                                                                                                                 |
| PG3-4R-5RACE | TGCCTCCGAGTCCGTCCCACC      |                                                                  |                                                                                                                                 |
| PG3-5R-5RACE | CAATCAAGTGTCCAGGTTTTCC     |                                                                  |                                                                                                                                 |
| PG4 R-5RACE  | GGGCTCCTACGCTCGTCTTCA      |                                                                  |                                                                                                                                 |
| PG5-1R-5RACE | GCAGGAGTTGATTGAAAACCCGTG   |                                                                  |                                                                                                                                 |
| PG5-2R-5RACE | TTATCGTCAAATGTGATGTGGTGG   |                                                                  |                                                                                                                                 |
| PG6 R-5RACE  | TCTGGGGAGGTGTTCTAAGC       |                                                                  |                                                                                                                                 |
| PG1-1F       | GCAGTGATCGGTTTCGACTGAG     |                                                                  | Gene specific<br>primers used for<br>the cloning of the<br>open reading<br>frames of<br><i>Apolygus<br/>lucorum</i> PG<br>genes |
| PG1-1R       | GGGAATTAGGGACAATGTGTAT     |                                                                  |                                                                                                                                 |
| PG1-2F       | GTGCCGTGTGTTGTTGATGAC      |                                                                  |                                                                                                                                 |
| PG1-2R       | TCACGGCATAGTATTTATTCA      |                                                                  |                                                                                                                                 |
| PG1-3F       | ACTGCGAGAATGATGTTCGC       |                                                                  |                                                                                                                                 |
| PG1-3R       | AGGTACGAGATAGGATTATA       |                                                                  |                                                                                                                                 |
| PG2-1F       | TCGAGCAGCACTGAAAGCTA       |                                                                  |                                                                                                                                 |
| PG2-1R       | CATTATTCATATTTTATTGC       |                                                                  |                                                                                                                                 |
| PG2-2F       | AATTTCTCTCGTTAGCTGCAC      |                                                                  |                                                                                                                                 |
| PG2-2R       | ATCTTTTTTTCTTTATTGAA       |                                                                  |                                                                                                                                 |
| PG3-1F       | AGCGCATCTGATTCAGCTAA       |                                                                  |                                                                                                                                 |
| PG3-1R       | AATTGAACAATTCTCTGTATT      |                                                                  |                                                                                                                                 |
| PG3-2F       | AGTCTTCGGCAGGCACCAGAAAGC   |                                                                  |                                                                                                                                 |
| PG3-2R       | GATAATTGATATATTTTAATTGTC   |                                                                  |                                                                                                                                 |
| PG3-3F       | GAGGTGAGATAACTGATTGTG      |                                                                  |                                                                                                                                 |

|             |                                          |                                                                                                          |
|-------------|------------------------------------------|----------------------------------------------------------------------------------------------------------|
| PG3-3R      | AAACAAGACGTTATCTAACTT                    |                                                                                                          |
| PG3-4F      | TCAAGATCTCAGAGAGAGCGG                    |                                                                                                          |
| PG3-4R      | GACACTTCGAAACACGAGTTT                    |                                                                                                          |
| PG3-5F      | AATATTCTTGCCAACGATTGAACC                 |                                                                                                          |
| PG3-5R      | GTAATGTAATTTTAGTTTATTTC                  |                                                                                                          |
| PG4F        | CAGTCCCATTCTCACAGTT                      |                                                                                                          |
| PG4R        | ACGTTGCGACTAAATTATTTA                    |                                                                                                          |
| PG5-1F      | ACACTTCACCTAGAACAACCTCAAC                |                                                                                                          |
| PG5-1R      | GCAGTAGATTAGTTTATTGAGTCC                 |                                                                                                          |
| PG5-2F      | AGACTTTTCATCTCACCAAGA                    |                                                                                                          |
| PG5-2R      | CATAAAATATTTATTTGAGGG                    |                                                                                                          |
| PG6F        | CGAGCTGTCAGCTTAGGAAC                     |                                                                                                          |
| PG6R        | CAAATCCCAACATTCAGTAT                     |                                                                                                          |
| PG1-1 F     | CCAAGCATGGTGGACATAACAC                   | Oligonucleotide primers used for gene expression analysis of the PG genes from <i>Apolygus lucorum</i> . |
| PG1-1 R     | CTCCGACACACTTGGCATTTC                    |                                                                                                          |
| PG1-1 Probe | FAM-TACAATCAAGACGACTGCTTTGCGACAACA-TAMRA |                                                                                                          |
| PG1-2 F     | TTGATTGACGGTGAAGGCCATA                   |                                                                                                          |
| PG1-2 R     | ATTGGCGACGAAACAATCTTTT                   |                                                                                                          |
| PG1-2 Probe | FAM-CCACGGAGGCAAAAAGAAGCCCA-TAMRA        |                                                                                                          |
| PG1-3 F     | TCTAATTGCGGCAGTCGC                       |                                                                                                          |
| PG1-3 R     | CCGCTTGTCAGCACTTTTCTT                    |                                                                                                          |
| PG1-3 Probe | FAM-CAATAACTTCGACCAACTCGCTGCGG-TAMRA     |                                                                                                          |
| PG2-1 F     | GGTGCCACAACACTGCTATTTT                   |                                                                                                          |
| PG2-1 R     | TCTTCCAGCCCTGCCGTCT                      |                                                                                                          |
| PG2-1 Probe | FAM-AGAATAACCGTTGACAACAAAGCTGCCG-TAMRA   |                                                                                                          |
| PG2-2 F     | CGATCTCCAAAATAACCGTTGA                   |                                                                                                          |
| PG2-2 R     | CGGTGACGAAGCAGTCATCTT                    |                                                                                                          |
| PG2-2 Probe | FAM-TTGGGTTATGCCACCAACATTACTGTCCG-TAMRA  |                                                                                                          |
| PG3-1 F     | GAGGACACAACACTGACGGTTT                   |                                                                                                          |
| PG3-1 R     | TTCCATGTCCTCCACGACACT                    |                                                                                                          |
| PG3-1 Probe | FAM-CCAAGACGACTGTCTGGCTCTCAGCTC-TAMRA    |                                                                                                          |
| PG3-2 F     | ACGACTGTCATCACACCGACTT                   |                                                                                                          |
| PG3-2 R     | GGCAGTCGTCTTGATTGTAACTC                  |                                                                                                          |
| PG3-2 Probe | FAM-CACAAGAAAGGAGGCCACAACACAGACG-TAMRA   |                                                                                                          |
| PG3-3 F     | TCAACGTTCCCGCTGGAA                       |                                                                                                          |
| PG3-3 R     | GTAACGCGTCCATGGAATTCTAT                  |                                                                                                          |
| PG3-3 Probe | FAM-TGCACTTGACTTCCAAGGTTTCGACG-TAMRA     |                                                                                                          |
| PG3-4 F     | TCATCGGCAACTACCTGAACTC                   |                                                                                                          |
| PG3-4 R     | ATTTCCAGTTGGATCCGTTCTT                   |                                                                                                          |
| PG3-4 Probe | FAM-CTCCCATCCAGGATCTGACCATCA-TAMRA       |                                                                                                          |
| PG3-5 F     | ATGTACCCGCTGGAAAGTCATT                   |                                                                                                          |
| PG3-5 R     | CAGGTTTTCCCTCGACAGTCAA                   |                                                                                                          |
| PG3-5 Probe | FAM-AACCAAAATTACTTTCACTGGCCGCATCA-TAMRA  |                                                                                                          |
| PG4 F       | CGTCATTCTCAAGGATATCCAACA                 |                                                                                                          |
| PG4 R       | TTGGAACCTCCCTTTTGAACAG                   |                                                                                                          |
| PG4 Probe   | FAM-AATCATCGTCCACGGAAACTACCCCAAC-TAMRA   |                                                                                                          |
| PG5-1 F     | ACTTCAAGCGGCCAAAAACTCT                   |                                                                                                          |
| PG5-1 R     | ATCTGCCAGCGAATTCCA                       |                                                                                                          |

|             |                                          |
|-------------|------------------------------------------|
| PG5-1 Probe | FAM-TCAATGTTCCCTGCTGGAGTCACGCTCG-TAMRA   |
| PG5-2 F     | AACGTCGTTGATGATGTCCTTGT                  |
| PG5-2 R     | TCCACCGTTAGCATAGTTACCAA                  |
| PG5-2 Probe | FAM-AAGGTAATCAACAACGACAACGGAATCCGC-TAMRA |
| PG6 F       | CATCGCAGTCAAATCAGGAACT                   |
| PG6 R       | ACCAGCACTCGTTCCACAATAT                   |
| PG6 Probe   | FAM-CCAGAACAACACTACTGCTCGGGAGGACA-TAMRA  |
| Actin F     | TCTTGCGGTATCCACGAAAC                     |
| Actin R     | GAGGGCGGTGATTTCTTCT                      |
| Actin Probe | FAM-ACTCCATCATGAAGTGCGACGTCGA-TAMRA      |
| GAPDH F     | CTGGAGCTGAATACGTCGTTGAA                  |
| GAPDH R     | GAGGGATCGTAGGCTTCCAAGTT                  |
| GAPDH Probe | FAM-AAAGCAAAGGCCACATCGACGGA-TAMRA        |

---
