# Supplementary material for: Molecular Characterization and Expression Profiles of Polygalacturonase Genes in Apolygus lucorum (Hemiptera: Miridae)
Source: PubMed Central journal article supplement (PMC4425681; doi:10.1371/journal.pone.0126391), 2015-05-08
Supplement: pone.0126391.s005.pdf [file pone.0126391.s005.pdf]

**S2 Table. Sequences from the cDNA library showing high identities with PG genes.**

| GeneID          | BestHits                   | Identity | E-value   | Description                              |
|-----------------|----------------------------|----------|-----------|------------------------------------------|
| Contig560       | gi 399207673 gb AFP33367.1 | 66.39    | 1.00E-98  | polygalacturonase 6 [Apolygus lucorum]   |
| Contig560       | gi 145098373 gb ABD63920.1 | 52.85    | 3.00E-77  | polygalacturonase PG1 [Lygus lineolaris] |
| Contig560       | gi 409150895 gb AFV15473.1 | 46.92    | 7.00E-65  | polygalacturonase PG1 [Apolygus lucorum] |
| Contig520       | gi 399207673 gb AFP33367.1 | 70.09    | 3.00E-166 | polygalacturonase 6 [Apolygus lucorum]   |
| Contig520       | gi 145098373 gb ABD63920.1 | 57.58    | 6.00E-133 | polygalacturonase PG1 [Lygus lineolaris] |
| Contig520       | gi 409150895 gb AFV15473.1 | 50.57    | 2.00E-101 | polygalacturonase PG1 [Apolygus lucorum] |
| XT5K-10_E04_024 | gi 399207673 gb AFP33367.1 | 68.92    | 6.00E-95  | polygalacturonase 6 [Apolygus lucorum]   |
| XT5K-10_E04_024 | gi 399207677 gb AFP33369.1 | 54.84    | 5.00E-67  | polygalacturonase 9 [Apolygus lucorum]   |
| XT5K-10_E04_024 | gi 409150895 gb AFV15473.1 | 55.3     | 6.00E-67  | polygalacturonase PG1 [Apolygus lucorum] |
| XT5K-13_E08_056 | gi 399207673 gb AFP33367.1 | 68.9     | 4.00E-117 | polygalacturonase 6 [Apolygus lucorum]   |
| XT5K-13_E08_056 | gi 145098373 gb ABD63920.1 | 53.96    | 2.00E-81  | polygalacturonase PG1 [Lygus lineolaris] |
| XT5K-13_E08_056 | gi 409150895 gb AFV15473.1 | 51.77    | 1.00E-78  | polygalacturonase PG1 [Apolygus lucorum] |
| XT5K-14_B06_046 | gi 399207673 gb AFP33367.1 | 63.14    | 2.00E-121 | polygalacturonase 6 [Apolygus lucorum]   |
| XT5K-14_B06_046 | gi 145098373 gb ABD63920.1 | 52.1     | 2.00E-83  | polygalacturonase PG1 [Lygus lineolaris] |
| XT5K-14_B06_046 | gi 409150895 gb AFV15473.1 | 49.04    | 2.00E-80  | polygalacturonase PG1 [Apolygus lucorum] |
| XT5K-43_H05_033 | gi 399207673 gb AFP33367.1 | 65.91    | 8.00E-117 | polygalacturonase 6 [Apolygus lucorum]   |
| XT5K-43_H05_033 | gi 145098373 gb ABD63920.1 | 51.66    | 3.00E-80  | polygalacturonase PG1 [Lygus lineolaris] |
| XT5K-43_H05_033 | gi 409150895 gb AFV15473.1 | 50.97    | 1.00E-78  | polygalacturonase PG1 [Apolygus lucorum] |
| Contig549       | gi 145098373 gb ABD63920.1 | 89.3     | 2.00E-151 | polygalacturonase PG1 [Lygus lineolaris] |
| Contig549       | gi 399207673 gb AFP33367.1 | 64.85    | 8.00E-101 | polygalacturonase 6 [Apolygus lucorum]   |
| Contig549       | gi 399207671 gb AFP33366.1 | 57.59    | 3.00E-94  | polygalacturonase 5 [Apolygus lucorum]   |
| A08_XT5K-1      | gi 399207673 gb AFP33367.1 | 69.39    | 1.00E-127 | polygalacturonase 6 [Apolygus lucorum]   |
| A08_XT5K-1      | gi 145098373 gb ABD63920.1 | 62.93    | 8.00E-97  | polygalacturonase PG1 [Lygus lineolaris] |
| A08_XT5K-1      | gi 399207657 gb AFP33359.1 | 50.96    | 8.00E-74  | polygalacturonase 1 [Apolygus lucorum]   |
| XT5K-27_G02_004 | gi 399207673 gb AFP33367.1 | 56.73    | 8.00E-117 | polygalacturonase 6 [Apolygus lucorum]   |
| XT5K-27_G02_004 | gi 145098373 gb ABD63920.1 | 45.76    | 5.00E-78  | polygalacturonase PG1 [Lygus lineolaris] |
| XT5K-27_G02_004 | gi 409150895 gb AFV15473.1 | 42.65    | 2.00E-69  | polygalacturonase PG1 [Apolygus lucorum] |
| XT5K-14_B11_093 | gi 399207673 gb AFP33367.1 | 48.24    | 2.00E-20  | polygalacturonase 6 [Apolygus lucorum]   |

|                 |                            |       |           |                                                                           |
|-----------------|----------------------------|-------|-----------|---------------------------------------------------------------------------|
| XT5K-14_B11_093 | gi 145098373 gb ABD63920.1 | 33.33 | 1.00E-11  | polygalacturonase PG1 [Lygus lineolaris]                                  |
| XT5K-14_B11_093 | gi 409150895 gb AFV15473.1 | 36.27 | 1.00E-04  | polygalacturonase PG1 [Apolygus lucorum]                                  |
| XT5K-14_B12_094 | gi 399207673 gb AFP33367.1 | 90.91 | 0         | polygalacturonase 6 [Apolygus lucorum]                                    |
| XT5K-14_B12_094 | gi 145098373 gb ABD63920.1 | 57.88 | 1.00E-116 | polygalacturonase PG1 [Lygus lineolaris]                                  |
| XT5K-14_B12_094 | gi 399207667 gb AFP33364.1 | 52.72 | 7.00E-95  | polygalacturonase 14 [Apolygus lucorum]                                   |
| XT5K-40_A11_095 | gi 399207673 gb AFP33367.1 | 61.52 | 8.00E-117 | polygalacturonase 6 [Apolygus lucorum]                                    |
| XT5K-40_A11_095 | gi 145098373 gb ABD63920.1 | 53.67 | 6.00E-65  | polygalacturonase PG1 [Lygus lineolaris]                                  |
| XT5K-40_A11_095 | gi 409150895 gb AFV15473.1 | 49.11 | 4.00E-59  | polygalacturonase PG1 [Apolygus lucorum]                                  |
| H05_XT5K-1      | gi 399207659 gb AFP33360.1 | 45.61 | 0.5       | polygalacturonase 2 [Apolygus lucorum]                                    |
| H05_XT5K-1      | gi 399207669 gb AFP33365.1 | 74.32 | 9.00E-170 | polygalacturonase 4 [Apolygus lucorum]                                    |
| H05_XT5K-1      | gi 409150911 gb AFV15475.1 | 74.32 | 2.00E-169 | polygalacturonase PG2-2 [Apolygus lucorum]                                |
| XT5K-32_G04_020 | gi 399207659 gb AFP33360.1 | 98.01 | 1.00E-174 | polygalacturonase 2 [Apolygus lucorum]                                    |
| XT5K-32_G04_020 | gi 409150911 gb AFV15475.1 | 80.56 | 2.00E-144 | polygalacturonase PG2-2 [Apolygus lucorum]                                |
| XT5K-32_G04_020 | gi 145098420 gb ABD63921.1 | 75.38 | 6.00E-140 | polygalacturonase PG2 [Lygus lineolaris]                                  |
| XT5K-35_E04_024 | gi 399207659 gb AFP33360.1 | 81.54 | 0         | polygalacturonase 2 [Apolygus lucorum]                                    |
| XT5K-35_E04_024 | gi 409150911 gb AFV15475.1 | 69.71 | 5.00E-171 | polygalacturonase PG2-2 [Apolygus lucorum]                                |
| XT5K-35_E04_024 | gi 399207669 gb AFP33365.1 | 69.43 | 8.00E-170 | polygalacturonase 4 [Apolygus lucorum]                                    |
| XT5K-52_B06_046 | gi 399207659 gb AFP33360.1 | 97.27 | 0         | polygalacturonase 2 [Apolygus lucorum]                                    |
| XT5K-52_B06_046 | gi 409150911 gb AFV15475.1 | 76.53 | 2.00E-164 | polygalacturonase PG2-2 [Apolygus lucorum]                                |
| XT5K-52_B06_046 | gi 399207669 gb AFP33365.1 | 76.19 | 2.00E-163 | polygalacturonase 4 [Apolygus lucorum]                                    |
| Contig10        | gi 399207669 gb AFP33365.1 | 96.17 | 0         | polygalacturonase 4 [Apolygus lucorum]                                    |
| Contig10        | gi 409150911 gb AFV15475.1 | 96.17 | 0         | polygalacturonase PG2-2 [Apolygus lucorum]                                |
| Contig10        | gi 145098420 gb ABD63921.1 | 80.55 | 0         | polygalacturonase PG2 [Lygus lineolaris]                                  |
| Contig353       | gi 399207675 gb AFP33368.1 | 99.44 | 0         | polygalacturonase 8 [Apolygus lucorum]                                    |
| Contig353       | gi 667527577 gb KFA55692.1 | 53.22 | 7.00E-89  | hypothetical protein S40293_05245 [Stachybotrys chartarum IBT 40293]      |
| Contig353       | gi 667720092 gb KFA62413.1 | 52.88 | 5.00E-88  | hypothetical protein S40285_06406 [Stachybotrys chlorohalonata IBT 40285] |
| XT5K-25_E07_055 | gi 409150911 gb AFV15475.1 | 92.2  | 0         | polygalacturonase PG2-2 [Apolygus lucorum]                                |
| XT5K-25_E07_055 | gi 399207669 gb AFP33365.1 | 90.75 | 0         | polygalacturonase 4 [Apolygus lucorum]                                    |
| XT5K-25_E07_055 | gi 145098420 gb ABD63921.1 | 71.62 | 0         | polygalacturonase PG2 [Lygus lineolaris]                                  |
| H12_XT5K-1      | gi 399207669 gb AFP33365.1 | 86.29 | 2.00E-66  | polygalacturonase 4 [Apolygus lucorum]                                    |
| H12_XT5K-1      | gi 409150911 gb AFV15475.1 | 83.06 | 7.00E-63  | polygalacturonase PG2-2 [Apolygus lucorum]                                |

|                 |                            |       |           |                                            |
|-----------------|----------------------------|-------|-----------|--------------------------------------------|
| H12_XT5K-1      | gi 145098420 gb ABD63921.1 | 71.2  | 2.00E-55  | polygalacturonase PG2 [Lygus lineolaris]   |
| XT5K-54_C01_011 | gi 399207669 gb AFP33365.1 | 96.21 | 0         | polygalacturonase 4 [Apolygus lucorum]     |
| XT5K-54_C01_011 | gi 409150911 gb AFV15475.1 | 94.83 | 0         | polygalacturonase PG2-2 [Apolygus lucorum] |
| XT5K-54_C01_011 | gi 145098420 gb ABD63921.1 | 81.31 | 4.00E-170 | polygalacturonase PG2 [Lygus lineolaris]   |
| Contig125       | gi 399207657 gb AFP33359.1 | 59.84 | 4.00E-96  | polygalacturonase 1 [Apolygus lucorum]     |
| Contig125       | gi 399207677 gb AFP33369.1 | 58.9  | 8.00E-92  | polygalacturonase 9 [Apolygus lucorum]     |
| Contig125       | gi 409150895 gb AFV15473.1 | 57.63 | 1.00E-90  | polygalacturonase PG1 [Apolygus lucorum]   |
| Contig249       | gi 399207657 gb AFP33359.1 | 60.23 | 7.00E-97  | polygalacturonase 1 [Apolygus lucorum]     |
| Contig249       | gi 399207661 gb AFP33361.1 | 61.74 | 7.00E-90  | polygalacturonase 10 [Apolygus lucorum]    |
| Contig249       | gi 399207677 gb AFP33369.1 | 58.96 | 3.00E-89  | polygalacturonase 9 [Apolygus lucorum]     |
| XT5K-13_E04_024 | gi 399207657 gb AFP33359.1 | 61.01 | 8.00E-123 | polygalacturonase 1 [Apolygus lucorum]     |
| XT5K-13_E04_024 | gi 399207677 gb AFP33369.1 | 60    | 6.00E-115 | polygalacturonase 9 [Apolygus lucorum]     |
| XT5K-13_E04_024 | gi 409150895 gb AFV15473.1 | 59.02 | 6.00E-113 | polygalacturonase PG1 [Apolygus lucorum]   |
| XT5K-13_E11_087 | gi 399207657 gb AFP33359.1 | 58.98 | 1.00E-121 | polygalacturonase 1 [Apolygus lucorum]     |
| XT5K-13_E11_087 | gi 399207677 gb AFP33369.1 | 58.41 | 3.00E-112 | polygalacturonase 9 [Apolygus lucorum]     |
| XT5K-13_E11_087 | gi 399207661 gb AFP33361.1 | 61.01 | 2.00E-110 | polygalacturonase 10 [Apolygus lucorum]    |
| XT5K-15_A07_063 | gi 399207657 gb AFP33359.1 | 60.94 | 5.00E-112 | polygalacturonase 1 [Apolygus lucorum]     |
| XT5K-15_A07_063 | gi 399207677 gb AFP33369.1 | 55.49 | 2.00E-108 | polygalacturonase 9 [Apolygus lucorum]     |
| XT5K-15_A07_063 | gi 409150895 gb AFV15473.1 | 54.57 | 2.00E-106 | polygalacturonase PG1 [Apolygus lucorum]   |
| XT5K-20_F05_037 | gi 399207657 gb AFP33359.1 | 60.38 | 3.00E-98  | polygalacturonase 1 [Apolygus lucorum]     |
| XT5K-20_F05_037 | gi 399207661 gb AFP33361.1 | 61.07 | 4.00E-90  | polygalacturonase 10 [Apolygus lucorum]    |
| XT5K-20_F05_037 | gi 399207677 gb AFP33369.1 | 58.96 | 6.00E-90  | polygalacturonase 9 [Apolygus lucorum]     |
| XT5K-35_E03_023 | gi 399207657 gb AFP33359.1 | 61.64 | 9.00E-118 | polygalacturonase 1 [Apolygus lucorum]     |
| XT5K-35_E03_023 | gi 399207677 gb AFP33369.1 | 55.49 | 1.00E-110 | polygalacturonase 9 [Apolygus lucorum]     |
| XT5K-35_E03_023 | gi 409150895 gb AFV15473.1 | 54.3  | 3.00E-108 | polygalacturonase PG1 [Apolygus lucorum]   |
| XT5K-35_H12_082 | gi 399207657 gb AFP33359.1 | 61.27 | 7.00E-122 | polygalacturonase 1 [Apolygus lucorum]     |
| XT5K-35_H12_082 | gi 399207677 gb AFP33369.1 | 60.6  | 9.00E-115 | polygalacturonase 9 [Apolygus lucorum]     |
| XT5K-35_H12_082 | gi 409150895 gb AFV15473.1 | 59.6  | 1.00E-112 | polygalacturonase PG1 [Apolygus lucorum]   |
| XT5K-38_C10_076 | gi 399207657 gb AFP33359.1 | 57.74 | 8.00E-109 | polygalacturonase 1 [Apolygus lucorum]     |
| XT5K-38_C10_076 | gi 399207677 gb AFP33369.1 | 56.76 | 2.00E-100 | polygalacturonase 9 [Apolygus lucorum]     |
| XT5K-38_C10_076 | gi 399207661 gb AFP33361.1 | 59.15 | 2.00E-99  | polygalacturonase 10 [Apolygus lucorum]    |

|                 |                            |       |           |                                                                           |
|-----------------|----------------------------|-------|-----------|---------------------------------------------------------------------------|
| XT5K-51_C07_059 | gi 399207657 gb AFP33359.1 | 61.59 | 5.00E-117 | polygalacturonase 1 [Aplygus lucorum]                                     |
| XT5K-51_C07_059 | gi 399207677 gb AFP33369.1 | 59.86 | 4.00E-107 | polygalacturonase 9 [Aplygus lucorum]                                     |
| XT5K-51_C07_059 | gi 399207661 gb AFP33361.1 | 61.59 | 6.00E-106 | polygalacturonase 10 [Aplygus lucorum]                                    |
| XT_G02_004      | gi 399207677 gb AFP33369.1 | 60.34 | 5.00E-107 | polygalacturonase 9 [Aplygus lucorum]                                     |
| XT_G02_004      | gi 409150895 gb AFV15473.1 | 59.31 | 6.00E-105 | polygalacturonase PG1 [Aplygus lucorum]                                   |
| XT_G02_004      | gi 399207663 gb AFP33362.1 | 58.1  | 5.00E-97  | polygalacturonase 11 [Aplygus lucorum]                                    |
| XT5K-9_D01_009  | gi 399207675 gb AFP33368.1 | 87.38 | 1.00E-158 | polygalacturonase 8 [Aplygus lucorum]                                     |
| XT5K-9_D01_009  | gi 667527577 gb KFA55692.1 | 51.69 | 6.00E-57  | hypothetical protein S40293_05245 [Stachybotrys chartarum IBT 40293]      |
| XT5K-9_D01_009  | gi 667720092 gb KFA62413.1 | 51.69 | 1.00E-56  | hypothetical protein S40285_06406 [Stachybotrys chlorohalonata IBT 40285] |
| XT5K-32_E11_087 | gi 399207677 gb AFP33369.1 | 78.45 | 0         | polygalacturonase 9 [Aplygus lucorum]                                     |
| XT5K-32_E11_087 | gi 409150895 gb AFV15473.1 | 78.16 | 0         | polygalacturonase PG1 [Aplygus lucorum]                                   |
| XT5K-32_E11_087 | gi 145098425 gb ABD63922.1 | 59.88 | 3.00E-143 | polygalacturonase PG3 [Lygus lineolaris]                                  |
| XT5K-44_C03_027 | gi 399207677 gb AFP33369.1 | 81.65 | 2.00E-149 | polygalacturonase 9 [Aplygus lucorum]                                     |
| XT5K-44_C03_027 | gi 409150895 gb AFV15473.1 | 80.9  | 1.00E-147 | polygalacturonase PG1 [Aplygus lucorum]                                   |
| XT5K-44_C03_027 | gi 145098425 gb ABD63922.1 | 62.02 | 1.00E-111 | polygalacturonase PG3 [Lygus lineolaris]                                  |
| XT5K-44_H04_018 | gi 145098425 gb ABD63922.1 | 90.97 | 0         | polygalacturonase PG3 [Lygus lineolaris]                                  |
| XT5K-44_H04_018 | gi 399207677 gb AFP33369.1 | 54.8  | 7.00E-111 | polygalacturonase 9 [Aplygus lucorum]                                     |
| XT5K-44_H04_018 | gi 409150895 gb AFV15473.1 | 54.49 | 4.00E-110 | polygalacturonase PG1 [Aplygus lucorum]                                   |
| XT5K-26_B02_014 | gi 399207661 gb AFP33361.1 | 83.45 | 4.00E-163 | polygalacturonase 10 [Aplygus lucorum]                                    |
| XT5K-26_B02_014 | gi 399207677 gb AFP33369.1 | 65.64 | 8.00E-117 | polygalacturonase 9 [Aplygus lucorum]                                     |
| XT5K-26_B02_014 | gi 409150895 gb AFV15473.1 | 65.64 | 3.00E-116 | polygalacturonase PG1 [Aplygus lucorum]                                   |
| XT5K-29_E09_071 | gi 399207661 gb AFP33361.1 | 93.48 | 2.00E-173 | polygalacturonase 10 [Aplygus lucorum]                                    |
| XT5K-29_E09_071 | gi 399207657 gb AFP33359.1 | 91.76 | 4.00E-173 | polygalacturonase 1 [Aplygus lucorum]                                     |
| XT5K-29_E09_071 | gi 399207677 gb AFP33369.1 | 72.36 | 2.00E-126 | polygalacturonase 9 [Aplygus lucorum]                                     |
| XT5K-29_F02_006 | gi 399207657 gb AFP33359.1 | 90.49 | 3.00E-172 | polygalacturonase 1 [Aplygus lucorum]                                     |
| XT5K-29_F02_006 | gi 399207661 gb AFP33361.1 | 78.18 | 5.00E-145 | polygalacturonase 10 [Aplygus lucorum]                                    |
| XT5K-29_F02_006 | gi 399207677 gb AFP33369.1 | 63.18 | 1.00E-107 | polygalacturonase 9 [Aplygus lucorum]                                     |
| xt5k-33_B08_062 | gi 399207657 gb AFP33359.1 | 98.68 | 0         | polygalacturonase 1 [Aplygus lucorum]                                     |
| xt5k-33_B08_062 | gi 399207661 gb AFP33361.1 | 88.78 | 0         | polygalacturonase 10 [Aplygus lucorum]                                    |
| xt5k-33_B08_062 | gi 399207677 gb AFP33369.1 | 69.02 | 4.00E-128 | polygalacturonase 9 [Aplygus lucorum]                                     |
| Contig278       | gi 399207677 gb AFP33369.1 | 71.6  | 3.00E-164 | polygalacturonase 9 [Aplygus lucorum]                                     |

|                 |                            |       |           |                                                                      |
|-----------------|----------------------------|-------|-----------|----------------------------------------------------------------------|
| Contig278       | gi 409150895 gb AFV15473.1 | 71    | 3.00E-163 | polygalacturonase PG1 [Apolygus lucorum]                             |
| Contig278       | gi 399207657 gb AFP33359.1 | 64.4  | 1.00E-133 | polygalacturonase 1 [Apolygus lucorum]                               |
| Contig379       | gi 399207677 gb AFP33369.1 | 47.18 | 6.00E-73  | polygalacturonase 9 [Apolygus lucorum]                               |
| Contig379       | gi 399207673 gb AFP33367.1 | 52.52 | 2.00E-71  | polygalacturonase 6 [Apolygus lucorum]                               |
| Contig379       | gi 409150895 gb AFV15473.1 | 45.97 | 2.00E-71  | polygalacturonase PG1 [Apolygus lucorum]                             |
| XT5K-3_C01_011  | gi 399207677 gb AFP33369.1 | 69.25 | 2.00E-144 | polygalacturonase 9 [Apolygus lucorum]                               |
| XT5K-3_C01_011  | gi 409150895 gb AFV15473.1 | 68.01 | 5.00E-142 | polygalacturonase PG1 [Apolygus lucorum]                             |
| XT5K-3_C01_011  | gi 399207657 gb AFP33359.1 | 65.98 | 2.00E-124 | polygalacturonase 1 [Apolygus lucorum]                               |
| XT5K-10_D04_026 | gi 409150895 gb AFV15473.1 | 51.16 | 6.00E-100 | polygalacturonase PG1 [Apolygus lucorum]                             |
| XT5K-10_D04_026 | gi 145098425 gb ABD63922.1 | 46.26 | 5.00E-81  | polygalacturonase PG3 [Lygus lineolaris]                             |
| XT5K-10_D04_026 | gi 399207657 gb AFP33359.1 | 49.31 | 1.00E-78  | polygalacturonase 1 [Apolygus lucorum]                               |
| XT5K-11_C04_028 | gi 399207677 gb AFP33369.1 | 71.54 | 9.00E-121 | polygalacturonase 9 [Apolygus lucorum]                               |
| XT5K-11_C04_028 | gi 409150895 gb AFV15473.1 | 70.04 | 2.00E-118 | polygalacturonase PG1 [Apolygus lucorum]                             |
| XT5K-11_C04_028 | gi 399207657 gb AFP33359.1 | 64.34 | 8.00E-103 | polygalacturonase 1 [Apolygus lucorum]                               |
| XT5K-50_F10_070 | gi 399207677 gb AFP33369.1 | 67.19 | 3.00E-134 | polygalacturonase 9 [Apolygus lucorum]                               |
| XT5K-50_F10_070 | gi 409150895 gb AFV15473.1 | 65.94 | 6.00E-132 | polygalacturonase PG1 [Apolygus lucorum]                             |
| XT5K-50_F10_070 | gi 399207657 gb AFP33359.1 | 64.21 | 1.00E-114 | polygalacturonase 1 [Apolygus lucorum]                               |
| XT5K-43_G06_036 | gi 399207677 gb AFP33369.1 | 82.15 | 9.00E-170 | polygalacturonase 9 [Apolygus lucorum]                               |
| XT5K-43_G06_036 | gi 409150895 gb AFV15473.1 | 81.48 | 5.00E-168 | polygalacturonase PG1 [Apolygus lucorum]                             |
| XT5K-43_G06_036 | gi 399207657 gb AFP33359.1 | 65.36 | 2.00E-133 | polygalacturonase 1 [Apolygus lucorum]                               |
| XT5K-9_C06_044  | gi 145098425 gb ABD63922.1 | 89.64 | 5.00E-123 | polygalacturonase PG3 [Lygus lineolaris]                             |
| XT5K-9_C06_044  | gi 399207657 gb AFP33359.1 | 62.98 | 6.00E-73  | polygalacturonase 1 [Apolygus lucorum]                               |
| XT5K-9_C06_044  | gi 399207677 gb AFP33369.1 | 59.9  | 3.00E-71  | polygalacturonase 9 [Apolygus lucorum]                               |
| XT5K-9_D11_089  | gi 145098425 gb ABD63922.1 | 80.19 | 1.00E-45  | polygalacturonase PG3 [Lygus lineolaris]                             |
| XT5K-9_D11_089  | gi 399207663 gb AFP33362.1 | 51    | 1.00E-18  | polygalacturonase 11 [Apolygus lucorum]                              |
| XT5K-9_D11_089  | gi 183181578 gb ACC44844.1 | 47.17 | 1.00E-17  | polygalacturonase [Lygus hesperus]                                   |
| XT5K-9_F12_086  | gi 399207657 gb AFP33359.1 | 47.37 | 1.00E-55  | polygalacturonase 1 [Apolygus lucorum]                               |
| XT5K-9_F12_086  | gi 399207661 gb AFP33361.1 | 45.4  | 3.00E-41  | polygalacturonase 10 [Apolygus lucorum]                              |
| XT5K-9_F12_086  | gi 399207677 gb AFP33369.1 | 36.03 | 1.00E-22  | polygalacturonase 9 [Apolygus lucorum]                               |
| XT5K-9_D01_009  | gi 399207675 gb AFP33368.1 | 87.38 | 1.00E-158 | polygalacturonase 8 [Apolygus lucorum]                               |
| XT5K-9_D01_009  | gi 667527577 gb KFA55692.1 | 51.69 | 6.00E-57  | hypothetical protein S40293_05245 [Stachybotrys chartarum IBT 40293] |

|                 |                             |       |           |                                                                                                          |
|-----------------|-----------------------------|-------|-----------|----------------------------------------------------------------------------------------------------------|
| XT5K-9_D01_009  | gi 667720092 gb KFA62413.1  | 51.69 | 1.00E-56  | hypothetical protein S40285_06406 [Stachybotrys chlorohalonata IBT 40285]                                |
| XT5K-12_D01_009 | gi 399207675 gb AFP33368.1  | 96.54 | 5.00E-175 | polygalacturonase 8 [Apolygus lucorum]                                                                   |
| XT5K-12_D01_009 | gi 667527577 gb KFA55692.1  | 54.47 | 1.00E-64  | hypothetical protein S40293_05245 [Stachybotrys chartarum IBT 40293]                                     |
| XT5K-12_D01_009 | gi 667720092 gb KFA62413.1  | 54.04 | 3.00E-64  | hypothetical protein S40285_06406 [Stachybotrys chlorohalonata IBT 40285]                                |
| XT5K-13_C07_059 | gi 399207675 gb AFP33368.1  | 98.88 | 1.00E-163 | polygalacturonase 8 [Apolygus lucorum]                                                                   |
| XT5K-13_C07_059 | gi 667527577 gb KFA55692.1  | 56.73 | 3.00E-59  | hypothetical protein S40293_05245 [Stachybotrys chartarum IBT 40293]                                     |
| XT5K-13_C07_059 | gi 667720092 gb KFA62413.1  | 56.25 | 8.00E-59  | hypothetical protein S40285_06406 [Stachybotrys chlorohalonata IBT 40285]                                |
| XT5K-35_F08_054 | gi 399207675 gb AFP33368.1  | 98.21 | 5.00E-173 | polygalacturonase 8 [Apolygus lucorum]                                                                   |
| XT5K-35_F08_054 | gi 183181578 gb ACC44844.1  | 51.07 | 4.00E-63  | polygalacturonase [Lygus hesperus]                                                                       |
| XT5K-35_F08_054 | gi 667527577 gb KFA55692.1  | 55.5  | 7.00E-63  | hypothetical protein S40293_05245 [Stachybotrys chartarum IBT 40293]                                     |
| XT5K-43_B05_045 | gi 399207675 gb AFP33368.1  | 98.88 | 9.00E-165 | polygalacturonase 8 [Apolygus lucorum]                                                                   |
| XT5K-43_B05_045 | gi 667527577 gb KFA55692.1  | 56.46 | 1.00E-59  | hypothetical protein S40293_05245 [Stachybotrys chartarum IBT 40293]                                     |
| XT5K-43_B05_045 | gi 667720092 gb KFA62413.1  | 55.98 | 3.00E-59  | hypothetical protein S40285_06406 [Stachybotrys chlorohalonata IBT 40285]                                |
| Contig486       | gi 399207675 gb AFP33368.1  | 66.47 | 3.00E-138 | polygalacturonase 8 [Apolygus lucorum]                                                                   |
| Contig486       | gi 183181578 gb ACC44844.1  | 48.65 | 3.00E-74  | polygalacturonase [Lygus hesperus]                                                                       |
| Contig486       | gi 399207667 gb AFP33364.1  | 48.41 | 1.00E-71  | polygalacturonase 14 [Apolygus lucorum]                                                                  |
| Contig504       | gi 399207665 gb AFP33363.1  | 81.74 | 1.00E-180 | polygalacturonase 12 [Apolygus lucorum]                                                                  |
| Contig504       | gi 399207667 gb AFP33364.1  | 81.29 | 4.00E-180 | polygalacturonase 14 [Apolygus lucorum]                                                                  |
| Contig504       | gi 183181578 gb ACC44844.1  | 79.59 | 3.00E-174 | polygalacturonase [Lygus hesperus]                                                                       |
| XT5K-5_B01_013  | gi 399207675 gb AFP33368.1  | 64.95 | 1.00E-120 | polygalacturonase 8 [Apolygus lucorum]                                                                   |
| XT5K-5_B01_013  | gi 183181578 gb ACC44844.1  | 47.46 | 7.00E-63  | polygalacturonase [Lygus hesperus]                                                                       |
| XT5K-5_B01_013  | gi 129938 gb P26215.1       | 50.4  | 3.00E-62  | RecName: Full=Polygalacturonase; Short=PG; AltName: Full=Pectinase; Flags: Precursor [Bipolaris zeicola] |
| XT5K-7_B09_077  | gi 399207675 gb AFP33368.1  | 66.67 | 1.00E-125 | polygalacturonase 8 [Apolygus lucorum]                                                                   |
| XT5K-7_B09_077  | gi 183181578 gb ACC44844.1  | 47.18 | 4.00E-65  | polygalacturonase [Lygus hesperus]                                                                       |
| XT5K-7_B09_077  | gi 475676944 gb EMT73962.1  | 48.52 | 5.00E-64  | hypothetical protein FOC4_g10000234 [Fusarium oxysporum f. sp. cubense race 4]                           |
| XT5K-10_B06_046 | gi 399207675 gb AFP33368.1  | 65.43 | 6.00E-61  | polygalacturonase 8 [Apolygus lucorum]                                                                   |
| XT5K-10_B06_046 | gi 323332833 gb EGA74237.1  | 50.27 | 7.00E-37  | Pgu1p [Saccharomyces cerevisiae AWRI796]                                                                 |
| XT5K-10_B06_046 | gi 398365647 gb NP_012687.1 | 50.27 | 8.00E-37  | Pgu1p [Saccharomyces cerevisiae S288c]                                                                   |
| XT5K-34_D03_025 | gi 399207675 gb AFP33368.1  | 66.67 | 3.00E-120 | polygalacturonase 8 [Apolygus lucorum]                                                                   |
| XT5K-34_D03_025 | gi 183181578 gb ACC44844.1  | 47.46 | 7.00E-63  | polygalacturonase [Lygus hesperus]                                                                       |
| XT5K-34_D03_025 | gi 129938 gb P26215.1       | 50.81 | 2.00E-62  | RecName: Full=Polygalacturonase; Short=PG; AltName: Full=Pectinase; Flags: Precursor [Bipolaris zeicola] |

|                 |                            |       |           |                                                                                                          |
|-----------------|----------------------------|-------|-----------|----------------------------------------------------------------------------------------------------------|
| XT5K-35_B03_029 | gi 399207675 gb AFP33368.1 | 66.79 | 5.00E-119 | polygalacturonase 8 [Apolygus lucorum]                                                                   |
| XT5K-35_B03_029 | gi 183181578 gb ACC44844.1 | 47.46 | 1.00E-62  | polygalacturonase [Lygus hesperus]                                                                       |
| XT5K-35_B03_029 | gi 129938 gb P26215.1      | 50.4  | 8.00E-62  | RecName: Full=Polygalacturonase; Short=PG; AltName: Full=Pectinase; Flags: Precursor [Bipolaris zeicola] |
| XT5K-37_G03_019 | gi 399207675 gb AFP33368.1 | 67.66 | 2.00E-102 | polygalacturonase 8 [Apolygus lucorum]                                                                   |
| XT5K-37_G03_019 | gi 667527577 gb KFA55692.1 | 47.41 | 8.00E-54  | hypothetical protein S40293_05245 [Stachybotrys chartarum IBT 40293]                                     |
| XT5K-37_G03_019 | gi 183181578 gb ACC44844.1 | 51.02 | 3.00E-52  | polygalacturonase [Lygus hesperus]                                                                       |
| XT5K-50_E08_056 | gi 399207675 gb AFP33368.1 | 65.88 | 1.00E-132 | polygalacturonase 8 [Apolygus lucorum]                                                                   |
| XT5K-50_E08_056 | gi 183181578 gb ACC44844.1 | 46.44 | 1.00E-67  | polygalacturonase [Lygus hesperus]                                                                       |
| XT5K-50_E08_056 | gi 129938 gb P26215.1      | 50.53 | 8.00E-66  | RecName: Full=Polygalacturonase; Short=PG; AltName: Full=Pectinase; Flags: Precursor [Bipolaris zeicola] |
| XT5K-54_B09_077 | gi 399207675 gb AFP33368.1 | 66.32 | 7.00E-124 | polygalacturonase 8 [Apolygus lucorum]                                                                   |
| XT5K-54_B09_077 | gi 183181578 gb ACC44844.1 | 47.22 | 6.00E-65  | polygalacturonase [Lygus hesperus]                                                                       |
| XT5K-54_B09_077 | gi 129938 gb P26215.1      | 50.19 | 2.00E-63  | RecName: Full=Polygalacturonase; Short=PG; AltName: Full=Pectinase; Flags: Precursor [Bipolaris zeicola] |
| XT5K-4_F06_038  | gi 399207663 gb AFP33362.1 | 60.19 | 3.00E-32  | polygalacturonase 11 [Apolygus lucorum]                                                                  |
| XT5K-4_F06_038  | gi 183181580 gb ACC44845.1 | 61.62 | 4.00E-31  | polygalacturonase [Lygus hesperus]                                                                       |
| XT5K-4_F06_038  | gi 183181278 gb ACC44798.1 | 61.62 | 5.00E-31  | polygalacturonase [Lygus hesperus]                                                                       |
| Contig458       | gi 183181580 gb ACC44845.1 | 52.71 | 9.00E-95  | polygalacturonase [Lygus hesperus]                                                                       |
| Contig458       | gi 183181578 gb ACC44844.1 | 52.41 | 2.00E-94  | polygalacturonase [Lygus hesperus]                                                                       |
| Contig458       | gi 183181278 gb ACC44798.1 | 50.3  | 1.00E-93  | polygalacturonase [Lygus hesperus]                                                                       |
| Contig552       | gi 183181578 gb ACC44844.1 | 49.22 | 1.00E-87  | polygalacturonase [Lygus hesperus]                                                                       |
| Contig552       | gi 183181580 gb ACC44845.1 | 48.91 | 2.00E-87  | polygalacturonase [Lygus hesperus]                                                                       |
| Contig552       | gi 183181278 gb ACC44798.1 | 49.22 | 5.00E-87  | polygalacturonase [Lygus hesperus]                                                                       |
| XT5K-3_H04_018  | gi 183181278 gb ACC44798.1 | 48.82 | 2.00E-71  | polygalacturonase [Lygus hesperus]                                                                       |
| XT5K-3_H04_018  | gi 183181580 gb ACC44845.1 | 48.82 | 2.00E-71  | polygalacturonase [Lygus hesperus]                                                                       |
| XT5K-3_H04_018  | gi 183181578 gb ACC44844.1 | 48.48 | 3.00E-71  | polygalacturonase [Lygus hesperus]                                                                       |
| XT5K-31_B12_094 | gi 183181278 gb ACC44798.1 | 45.37 | 2.00E-75  | polygalacturonase [Lygus hesperus]                                                                       |
| XT5K-31_B12_094 | gi 183181578 gb ACC44844.1 | 45.05 | 6.00E-75  | polygalacturonase [Lygus hesperus]                                                                       |
| XT5K-31_B12_094 | gi 183181580 gb ACC44845.1 | 44.73 | 3.00E-74  | polygalacturonase [Lygus hesperus]                                                                       |
| XT5K-53_G07_051 | gi 183181578 gb ACC44844.1 | 42.96 | 1.00E-63  | polygalacturonase [Lygus hesperus]                                                                       |
| XT5K-53_G07_051 | gi 183181580 gb ACC44845.1 | 42.61 | 2.00E-63  | polygalacturonase [Lygus hesperus]                                                                       |
| XT5K-53_G07_051 | gi 183181278 gb ACC44798.1 | 42.96 | 4.00E-63  | polygalacturonase [Lygus hesperus]                                                                       |
| XT5K-38_C01_011 | gi 183181578 gb ACC44844.1 | 57.44 | 2.00E-71  | polygalacturonase [Lygus hesperus]                                                                       |

---

|                 |                            |       |           |                                          |
|-----------------|----------------------------|-------|-----------|------------------------------------------|
| XT5K-38_C01_011 | gi 183181278 gb ACC44798.1 | 57.02 | 2.00E-71  | polygalacturonase [Lygus hesperus]       |
| XT5K-38_C01_011 | gi 183181580 gb ACC44845.1 | 56.61 | 4.00E-70  | polygalacturonase [Lygus hesperus]       |
| XT5K-40_E09_071 | gi 183181578 gb ACC44844.1 | 57.97 | 7.00E-77  | polygalacturonase [Lygus hesperus]       |
| XT5K-40_E09_071 | gi 183181278 gb ACC44798.1 | 60.22 | 9.00E-77  | polygalacturonase [Lygus hesperus]       |
| XT5K-40_E09_071 | gi 183181580 gb ACC44845.1 | 57.63 | 2.00E-76  | polygalacturonase [Lygus hesperus]       |
| XT5K-14_A05_047 | gi 399207667 gb AFP33364.1 | 99.64 | 1.00E-158 | polygalacturonase 14 [Apolygus lucorum]  |
| XT5K-14_A05_047 | gi 399207665 gb AFP33363.1 | 92.7  | 3.00E-148 | polygalacturonase 12 [Apolygus lucorum]  |
| XT5K-14_A05_047 | gi 183181578 gb ACC44844.1 | 82.67 | 1.00E-129 | polygalacturonase [Lygus hesperus]       |
| XT5K-30_F07_053 | gi 399207667 gb AFP33364.1 | 99.14 | 5.00E-148 | polygalacturonase 14 [Apolygus lucorum]  |
| XT5K-30_F07_053 | gi 399207665 gb AFP33363.1 | 90.99 | 2.00E-135 | polygalacturonase 12 [Apolygus lucorum]  |
| XT5K-30_F07_053 | gi 183181578 gb ACC44844.1 | 81.55 | 1.00E-115 | polygalacturonase [Lygus hesperus]       |
| XT5K-39_B02_014 | gi 399207663 gb AFP33362.1 | 88.05 | 2.00E-171 | polygalacturonase 11 [Apolygus lucorum]  |
| XT5K-39_B02_014 | gi 399207657 gb AFP33359.1 | 58.55 | 3.00E-105 | polygalacturonase 1 [Apolygus lucorum]   |
| XT5K-39_B02_014 | gi 399207677 gb AFP33369.1 | 59.86 | 8.00E-103 | polygalacturonase 9 [Apolygus lucorum]   |
| XT5K-50_H08_050 | gi 409150895 gb AFV15473.1 | 57.55 | 2.00E-70  | polygalacturonase PG1 [Apolygus lucorum] |
| XT5K-50_H08_050 | gi 399207657 gb AFP33359.1 | 54.88 | 7.00E-68  | polygalacturonase 1 [Apolygus lucorum]   |
| XT5K-50_H08_050 | gi 399207661 gb AFP33361.1 | 57.28 | 1.00E-63  | polygalacturonase 10 [Apolygus lucorum]  |

---
