# Supplementary material for: Molecular Characterization and Expression Profiles of Polygalacturonase Genes in Apolygus lucorum (Hemiptera: Miridae)
Source: PubMed Central journal article supplement (PMC4425681; doi:10.1371/journal.pone.0126391), 2015-05-08
Supplement: pone.0126391.s006.pdf [file pone.0126391.s006.pdf]

**S3 Table: Identities of the PG amino acid sequences from *Apolygus lucorum*.**

| Names of PG genes | PG1-1 | PG1-2 | PG1-3 | PG2-1 | PG2-2 | PG3-1 | PG3-2 | PG3-3 | PG3-4 | PG3-5 | PG4   | PG5-1 | PG5-2 | PG6   | AFP33359 | AFP33360 | AFP33361 | AFP33362 | AFP33363 | AFP33364 | AFP33365 | AFP33366 | AFP33367 | AFP33368 | AFP33369 | AFV15473 | AFV15474 | AFV15475 |  |  |
|-------------------|-------|-------|-------|-------|-------|-------|-------|-------|-------|-------|-------|-------|-------|-------|----------|----------|----------|----------|----------|----------|----------|----------|----------|----------|----------|----------|----------|----------|--|--|
| PG1-1             | ID    |       |       |       |       |       |       |       |       |       |       |       |       |       |          |          |          |          |          |          |          |          |          |          |          |          |          |          |  |  |
| PG1-2             | 0.617 | ID    |       |       |       |       |       |       |       |       |       |       |       |       |          |          |          |          |          |          |          |          |          |          |          |          |          |          |  |  |
| PG1-3             | 0.685 | 0.733 | ID    |       |       |       |       |       |       |       |       |       |       |       |          |          |          |          |          |          |          |          |          |          |          |          |          |          |  |  |
| PG2-1             | 0.396 | 0.409 | 0.439 | ID    |       |       |       |       |       |       |       |       |       |       |          |          |          |          |          |          |          |          |          |          |          |          |          |          |  |  |
| PG2-2             | 0.397 | 0.435 | 0.44  | 0.778 | ID    |       |       |       |       |       |       |       |       |       |          |          |          |          |          |          |          |          |          |          |          |          |          |          |  |  |
| PG3-1             | 0.455 | 0.449 | 0.441 | 0.346 | 0.337 | ID    |       |       |       |       |       |       |       |       |          |          |          |          |          |          |          |          |          |          |          |          |          |          |  |  |
| PG3-2             | 0.488 | 0.461 | 0.463 | 0.36  | 0.357 | 0.538 | ID    |       |       |       |       |       |       |       |          |          |          |          |          |          |          |          |          |          |          |          |          |          |  |  |
| PG3-3             | 0.504 | 0.484 | 0.501 | 0.374 | 0.36  | 0.565 | 0.621 | ID    |       |       |       |       |       |       |          |          |          |          |          |          |          |          |          |          |          |          |          |          |  |  |
| PG3-4             | 0.486 | 0.483 | 0.48  | 0.379 | 0.368 | 0.557 | 0.716 | 0.607 | ID    |       |       |       |       |       |          |          |          |          |          |          |          |          |          |          |          |          |          |          |  |  |
| PG3-5             | 0.5   | 0.461 | 0.477 | 0.347 | 0.362 | 0.557 | 0.817 | 0.641 | 0.723 | ID    |       |       |       |       |          |          |          |          |          |          |          |          |          |          |          |          |          |          |  |  |
| PG4               | 0.465 | 0.495 | 0.493 | 0.412 | 0.412 | 0.416 | 0.47  | 0.426 | 0.451 | 0.465 | ID    |       |       |       |          |          |          |          |          |          |          |          |          |          |          |          |          |          |  |  |
| PG5-1             | 0.493 | 0.463 | 0.522 | 0.4   | 0.38  | 0.446 | 0.528 | 0.494 | 0.504 | 0.515 | 0.476 | ID    |       |       |          |          |          |          |          |          |          |          |          |          |          |          |          |          |  |  |
| PG5-2             | 0.461 | 0.472 | 0.477 | 0.378 | 0.38  | 0.455 | 0.522 | 0.461 | 0.519 | 0.488 | 0.45  | 0.54  | ID    |       |          |          |          |          |          |          |          |          |          |          |          |          |          |          |  |  |
| PG6               | 0.401 | 0.387 | 0.376 | 0.311 | 0.316 | 0.36  | 0.4   | 0.365 | 0.39  | 0.383 | 0.37  | 0.445 | 0.386 | ID    |          |          |          |          |          |          |          |          |          |          |          |          |          |          |  |  |
| AFP33359          | 0.504 | 0.481 | 0.501 | 0.377 | 0.37  | 0.576 | 0.627 | 0.932 | 0.616 | 0.652 | 0.437 | 0.494 | 0.463 | 0.365 | ID       |          |          |          |          |          |          |          |          |          |          |          |          |          |  |  |
| AFP33360          | 0.39  | 0.409 | 0.439 | 0.989 | 0.778 | 0.343 | 0.355 | 0.366 | 0.374 | 0.342 | 0.415 | 0.395 | 0.373 | 0.308 | 0.371    | ID       |          |          |          |          |          |          |          |          |          |          |          |          |  |  |
| AFP33361          | 0.49  | 0.481 | 0.498 | 0.385 | 0.365 | 0.571 | 0.619 | 0.89  | 0.602 | 0.63  | 0.44  | 0.491 | 0.477 | 0.368 | 0.834    | 0.379    | ID       |          |          |          |          |          |          |          |          |          |          |          |  |  |
| AFP33362          | 0.473 | 0.476 | 0.509 | 0.403 | 0.386 | 0.525 | 0.659 | 0.583 | 0.629 | 0.718 | 0.464 | 0.48  | 0.457 | 0.375 | 0.588    | 0.395    | 0.577    | ID       |          |          |          |          |          |          |          |          |          |          |  |  |
| AFP33363          | 0.493 | 0.461 | 0.53  | 0.389 | 0.383 | 0.441 | 0.545 | 0.491 | 0.501 | 0.535 | 0.479 | 0.924 | 0.529 | 0.447 | 0.491    | 0.387    | 0.491    | 0.5      | ID       |          |          |          |          |          |          |          |          |          |  |  |
| AFP33364          | 0.493 | 0.463 | 0.519 | 0.397 | 0.383 | 0.444 | 0.528 | 0.491 | 0.504 | 0.515 | 0.476 | 0.985 | 0.537 | 0.439 | 0.491    | 0.392    | 0.488    | 0.477    | 0.916    | ID       |          |          |          |          |          |          |          |          |  |  |
| AFP33365          | 0.397 | 0.438 | 0.44  | 0.773 | 0.964 | 0.34  | 0.357 | 0.365 | 0.368 | 0.362 | 0.415 | 0.383 | 0.377 | 0.319 | 0.373    | 0.773    | 0.37     | 0.386    | 0.386    | 0.386    | ID       |          |          |          |          |          |          |          |  |  |
| AFP33366          | 0.372 | 0.394 | 0.41  | 0.46  | 0.474 | 0.343 | 0.331 | 0.337 | 0.336 | 0.331 | 0.386 | 0.361 | 0.337 | 0.312 | 0.346    | 0.463    | 0.351    | 0.356    | 0.364    | 0.361    | 0.471    | ID       |          |          |          |          |          |          |  |  |
| AFP33367          | 0.688 | 0.73  | 0.98  | 0.439 | 0.443 | 0.447 | 0.469 | 0.506 | 0.488 | 0.483 | 0.495 | 0.525 | 0.486 | 0.379 | 0.506    | 0.436    | 0.504    | 0.52     | 0.533    | 0.522    | 0.443    | 0.419    | ID       |          |          |          |          |          |  |  |
| AFP33368          | 0.423 | 0.393 | 0.395 | 0.306 | 0.306 | 0.386 | 0.389 | 0.382 | 0.38  | 0.379 | 0.373 | 0.428 | 0.394 | 0.647 | 0.39     | 0.306    | 0.382    | 0.36     | 0.426    | 0.426    | 0.303    | 0.304    | 0.403    | ID       |          |          |          |          |  |  |
| AFP33369          | 0.502 | 0.461 | 0.48  | 0.35  | 0.365 | 0.56  | 0.822 | 0.644 | 0.72  | 0.982 | 0.47  | 0.512 | 0.488 | 0.383 | 0.655    | 0.344    | 0.63     | 0.712    | 0.532    | 0.512    | 0.365    | 0.331    | 0.486    | 0.376    | ID       |          |          |          |  |  |
| AFV15473          | 0.505 | 0.466 | 0.483 | 0.352 | 0.362 | 0.552 | 0.817 | 0.647 | 0.715 | 0.957 | 0.476 | 0.509 | 0.488 | 0.389 | 0.652    | 0.347    | 0.633    | 0.718    | 0.526    | 0.509    | 0.362    | 0.336    | 0.488    | 0.387    | 0.971    | ID       |          |          |  |  |
| AFV15474          | 0.413 | 0.432 | 0.443 | 0.756 | 0.784 | 0.358 | 0.373 | 0.384 | 0.389 | 0.362 | 0.428 | 0.388 | 0.356 | 0.329 | 0.392    | 0.759    | 0.392    | 0.402    | 0.391    | 0.386    | 0.797    | 0.494    | 0.443    | 0.306    | 0.365    | 0.37     | ID       |          |  |  |
| AFV15475          | 0.395 | 0.435 | 0.438 | 0.773 | 0.972 | 0.337 | 0.354 | 0.362 | 0.37  | 0.36  | 0.412 | 0.386 | 0.382 | 0.319 | 0.37     | 0.773    | 0.368    | 0.386    | 0.388    | 0.388    | 0.978    | 0.474    | 0.44     | 0.303    | 0.362    | 0.36     | 0.784    | ID       |  |  |
