# Supplementary material for: Molecular Characterization and Expression Profiles of Polygalacturonase Genes in Apolygus lucorum (Hemiptera: Miridae)
Source: PubMed Central journal article supplement (PMC4425681; doi:10.1371/journal.pone.0126391), 2015-05-08
Supplement: pone.0126391.s007.pdf [file pone.0126391.s007.pdf]

**S4 Table: Paired Student's t-test of relative PG mRNA expression levels between male and female adults of *Apolygus lucorum*. The data represent the mean±SE of at least 3 repeats normalized relative to  $\beta$ -actin and GAPDH. \* P<0.05, \*\* P<0.01.**

| PG           | 1 day old     |               | 5 days old     |                 | 20 days old   |               | 30 days old   |                |
|--------------|---------------|---------------|----------------|-----------------|---------------|---------------|---------------|----------------|
|              | Male          | Female        | Male           | Female          | Male          | Female        | Male          | Female         |
| <b>PG1-1</b> | 0.0009+0.0002 | 0.0013+0.0005 | 0.0047+0.0001* | 0.0021+0.0001** | 0.0073+0.0008 | 0.0087+0.0044 | 0.0073+0.0001 | 0.0076+0.0020  |
| <b>PG1-2</b> | 0.0115+0.0032 | 0.0195+0.0058 | 0.2708+0.0244  | 0.0602+0.0112** | 0.1993+0.0567 | 0.0728+0.0313 | 0.1237+0.0413 | 0.0405+0.0090  |
| <b>PG1-3</b> | 0.0237+0.0044 | 0.0265+0.0096 | 0.2334+0.0429  | 0.0408+0.0137*  | 0.3673+0.0868 | 0.1349+0.0909 | 0.2395+0.0833 | 0.0867+0.0058  |
| <b>PG2-1</b> | 0.0013+0.0006 | 0.0035+0.0017 | 0.0201+0.0077  | 0.0044+0.0020   | 0.1206+0.0878 | 0.0236+0.0054 | 0.0675+0.0257 | 0.0661+0.0241  |
| <b>PG2-2</b> | 0.0198+0.0063 | 0.0255+0.0064 | 0.2858+0.0317  | 0.1496+0.0517   | 0.7046+0.4065 | 0.1394+0.0787 | 0.5115+0.1497 | 0.1358+0.0189  |
| <b>PG3-1</b> | 0.0116+0.0039 | 0.0070+0.0029 | 0.1453+0.0209  | 0.0279+0.0064** | 0.1139+0.0581 | 0.0266+0.0109 | 0.0624+0.0207 | 0.0135+0.0057  |
| <b>PG3-2</b> | 0.0043+0.0014 | 0.0042+0.0025 | 0.0145+0.0029  | 0.0027+0.0007*  | 0.0571+0.0225 | 0.0593+0.0209 | 0.0562+0.0263 | 0.0737+0.0407  |
| <b>PG3-3</b> | 0.0464+0.0207 | 0.0304+0.0095 | 0.8375+0.1428  | 0.2032+0.0500*  | 0.7994+0.3895 | 0.6055+0.2357 | 0.8442+0.2411 | 0.4450+0.1214  |
| <b>PG3-4</b> | 0.0121+0.0078 | 0.0155+0.0023 | 0.0921+0.0319  | 0.0404+0.0129   | 0.1722+0.0199 | 0.1444+0.0736 | 0.0740+0.0107 | 0.0929+0.0042  |
| <b>PG3-5</b> | 0.0136+0.0043 | 0.0115+0.0030 | 0.5042+0.0993  | 0.1959+0.0661   | 0.6266+0.2198 | 0.2735+0.1558 | 0.5535+0.2103 | 0.2318+0.0511  |
| <b>PG4</b>   | 0.0238+0.0054 | 0.0403+0.0141 | 0.1387+0.0151  | 0.0366+0.0126** | 0.2968+0.0423 | 0.1327+0.0702 | 0.2287+0.0997 | 0.1542+0.0401  |
| <b>PG5-1</b> | 0.0459+0.0114 | 0.0283+0.0073 | 0.5946+0.0243  | 0.1017+0.0297** | 0.5096+0.2883 | 0.1403+0.0964 | 0.3892+0.0953 | 0.1027+0.0312* |
| <b>PG5-2</b> | 0.0050+0.0019 | 0.0071+0.0022 | 0.0703+0.0215  | 0.0130+0.0023   | 0.1298+0.0246 | 0.0530+0.0156 | 0.0695+0.0296 | 0.0451+0.0006  |
| <b>PG6</b>   | 0.0005+0.0004 | 0.0010+0.0004 | 0.0138+0.0015  | 0.0069+0.0016*  | 0.0192+0.0015 | 0.0171+0.0072 | 0.0138+0.0009 | 0.0097+0.0013  |
